# Supplementary material
Source: MDPI journal article supplement (https://www.mdpi.com/2073-4441/16/4/552)
Supplement: s1 [file s1]

# Phytohormone Supplementation for Nutrient Removal from Mariculture Wastewater by *Oocystis borgei* in Sequential Batch Operation

**Yang Liu, Chengcheng Deng , Xinyue Song, Zhangxi Hu , Feng Li , Yulei Zhang, Changling Li, Xianghu Huang and Ning Zhang \***

Laboratory of Algae Resource Development and Aquaculture Environment Ecological Restoration, Fisheries College, Guangdong Ocean University, Zhanjiang 524088, China; 2112101066@stu.gdou.edu.cn (Y.L.); 2112101072@stu.gdou.edu.cn (C.D.); 2112201160@stu.gdou.edu.cn (X.S.); huzx@gdou.edu.cn (Z.H.); lifeng2318@gdou.edu.cn (F.L.); zhangyl@gdou.edu.cn (Y.Z.); licl@gdou.edu.cn (C.L.); huangxh@gdou.edu.cn (X.H.)

\* Correspondence: zhangn@gdou.edu.cn

**Supplementary Table captions**

**Table S1** Chemical composition and concentration of Zhanshui 107-13 medium and artificial seawater.

**Table S2** Chemical composition and concentration of artificial aquaculture wastewater.

**Table S3** Effect of phytohormones on the Nutrient Removal Rate of *O. borgei*.

**Table S4** Effect of phytohormones on photosynthetic pigments and chlorophyll fluorescence parameters of *O. borgei*.

**Table S5** Effect of phytohormones on activities of NR, GS, SOD and CAT in *O. borgei* after 4-day stimulation.

**Table S1** Chemical composition and concentration of Zhanshui 107-13 medium and artificial seawater.

|                        | Chemicals                                      | Concentration (g·L <sup>-1</sup> ) |
|------------------------|------------------------------------------------|------------------------------------|
| Zhanshui 107-13 medium | NaNO <sub>3</sub>                              | 8                                  |
|                        | K <sub>2</sub> HPO <sub>4</sub>                | 80                                 |
|                        | FeC <sub>6</sub> H <sub>5</sub> O <sub>7</sub> | 10                                 |
| Artificial seawater    | NaCl                                           | 21.994                             |
|                        | Na <sub>2</sub> SO <sub>4</sub>                | 3.550                              |
|                        | MgCl <sub>2</sub> ·6H <sub>2</sub> O           | 9.592                              |
|                        | CaCl <sub>2</sub>                              | 1.014                              |
|                        | KCl                                            | 0.599                              |
|                        | KBr                                            | 0.086                              |
|                        | H <sub>3</sub> BO <sub>4</sub>                 | 0.023                              |
|                        | SrCl·6H <sub>2</sub> O                         | 0.022                              |
|                        | NaF                                            | 0.003                              |
|                        | NaHCO <sub>3</sub>                             | 0.174                              |

**Note:** Artificial seawater is prepared for immediate use after autoclaving sterilization and sodium bicarbonate filtration for decontamination.

**Table S2** Chemical composition and concentration of artificial aquaculture wastewater.

| Chemicals                                            | Concentration (g·L <sup>-1</sup> ) |
|------------------------------------------------------|------------------------------------|
| NaAc                                                 | 0.077                              |
| KH <sub>2</sub> PO <sub>4</sub>                      | 0.013                              |
| NH <sub>4</sub> Cl                                   | 0.023                              |
| CaCl <sub>2</sub>                                    | 0.006                              |
| FeSO <sub>4</sub> ·7H <sub>2</sub> O                 | 0.001                              |
| MgSO <sub>4</sub> ·7H <sub>2</sub> O                 | 0.001                              |
| CuSO <sub>4</sub> ·5H <sub>2</sub> O                 | 0.008                              |
| MnCl·4H <sub>2</sub> O                               | 0.186                              |
| ZnSO <sub>4</sub> ·7H <sub>2</sub> O                 | 0.220                              |
| NaMoO <sub>4</sub> ·2H <sub>2</sub> O                | 0.390                              |
| Co(NO <sub>3</sub> ) <sub>2</sub> ·6H <sub>2</sub> O | 0.005                              |
| H <sub>3</sub> BO <sub>3</sub>                       | 0.286                              |

**Table S3** Effect of phytohormones on the Nutrient Removal Rate of *O. borgei*.

| Group   | Day<br>Nutrient                  | 1           | 2           | 3           | 4           | 5           | 6           | 7           | 8           | 9           | 10          | 11          |
|---------|----------------------------------|-------------|-------------|-------------|-------------|-------------|-------------|-------------|-------------|-------------|-------------|-------------|
|         |                                  |             |             |             |             |             |             |             |             |             |             |             |
| Control | NH <sub>4</sub> <sup>+</sup> -N  | 0.24±0.09   | 0.30±0.06   | 0.42±0.09   | 0.47±0.06   | 0.51±0.13   | 0.51±0.14   | 0.46±0.06   | 0.45±0.06   | 0.42±0.13   | 0.39±0.11   | 0.33±0.1    |
|         | NO <sub>2</sub> <sup>-</sup> -N  | 1.55±0.09   | 0.80±0.29   | 0.58±0.04   | 1.59±0.08   | 1.31±0.14   | 1.25±0.16   | 1.58±0.08   | 1.73±0.06   | 1.35±0.09   | 1.31±0.12   | 1.32±0.06   |
|         | NO <sub>3</sub> <sup>-</sup> -N  | 0.16±0.11   | 0.10±0.15   | 0.24±0.15   | 0.09±0.08   | 0.14±0.40   | 0.13±0.16   | 0.89±0.05   | 0.91±0.07   | 0.83±0.04   | 0.89±0.6    | 0.85±0.06   |
|         | PO <sub>4</sub> <sup>3-</sup> -P | 0.25±0.03   | 0.49±0.10   | 0.57±0.12   | 0.57±0.11   | 0.59±0.07   | 0.38±0.09   | 0.25±0.02   | 0.31±0.09   | 0.38±0.14   | 0.44±0.07   | 0.49±0.06   |
| IAA     | NH <sub>4</sub> <sup>+</sup> -N  | 0.70±0.04** | 0.74±0.09** | 0.77±0.12** | 0.79±0.14** | 0.85±0.10** | 0.86±0.11** | 0.73±0.10** | 0.73±0.12** | 0.72±0.16** | 0.78±0.07** | 0.69±0.07** |
|         | NO <sub>2</sub> <sup>-</sup> -N  | 1.89±0.18** | 1.83±0.08** | 1.84±0.10** | 2.08±0.08** | 1.84±0.11** | 1.83±0.07** | 2.21±0.08** | 2.28±0.13** | 2.18±0.11** | 2.16±0.08** | 1.92±0.23** |
|         | NO <sub>3</sub> <sup>-</sup> -N  | 2.06±0.05** | 2.07±0.06** | 2.06±0.07** | 2.51±0.13** | 2.60±0.08** | 2.61±0.06** | 2.70±0.06** | 2.70±0.07** | 2.69±0.06** | 2.70±0.06** | 2.70±0.06** |
|         | PO <sub>4</sub> <sup>3-</sup> -P | 0.97±0.07** | 1.48±0.09** | 1.40±0.05** | 1.38±0.11** | 1.32±0.15** | 1.37±0.04** | 1.10±0.02** | 1.14±0.07** | 1.31±0.08** | 1.39±0.04** | 1.43±0.26** |
| GA3     | NH <sub>4</sub> <sup>+</sup> -N  | 0.75±0.01** | 0.77±0.03** | 0.80±0.05** | 0.77±0.17** | 0.86±0.08** | 0.90±0.08** | 0.81±0.19** | 0.67±0.13** | 0.70±0.16** | 0.71±0.08** | 0.70±0.08** |
|         | NO <sub>2</sub> <sup>-</sup> -N  | 1.86±0.15** | 1.87±0.11** | 1.92±0.08** | 2.14±0.11** | 1.81±0.08** | 1.86±0.07** | 2.05±0.09** | 2.19±0.11** | 2.15±0.09** | 2.09±0.08** | 1.79±0.12** |
|         | NO <sub>3</sub> <sup>-</sup> -N  | 2.08±0.07** | 2.06±0.07** | 2.07±0.08** | 2.63±0.07** | 2.61±0.07** | 2.62±0.06** | 2.70±0.06** | 2.70±0.06** | 2.70±0.06** | 2.70±0.06** | 2.69±0.06** |
|         | PO <sub>4</sub> <sup>3-</sup> -P | 0.97±0.01** | 1.37±0.23** | 1.43±0.08** | 1.22±0.35** | 1.47±0.07** | 1.30±0.16** | 1.02±0.05** | 1.14±0.03** | 1.25±0.11** | 1.22±0.16** | 1.53±0.02** |
| ZT      | NH <sub>4</sub> <sup>+</sup> -N  | 0.73±0.16** | 0.76±0.09** | 0.79±0.12** | 0.81±0.13** | 0.82±0.01** | 0.89±0.07** | 0.71±0.10** | 0.74±0.10** | 0.74±0.10** | 0.71±0.02** | 0.79±0.12** |
|         | NO <sub>2</sub> <sup>-</sup> -N  | 1.84±0.06** | 1.83±0.08** | 1.86±0.10** | 2.05±0.11** | 1.80±0.06** | 1.85±0.09** | 1.98±0.07** | 2.07±0.07** | 2.07±0.07** | 2.05±0.10** | 1.75±0.06** |
|         | NO <sub>3</sub> <sup>-</sup> -N  | 2.06±0.05** | 2.06±0.05** | 2.05±0.03** | 2.62±0.07** | 2.61±0.06** | 2.62±0.06** | 2.70±0.06** | 2.70±0.06** | 2.70±0.06** | 2.70±0.06** | 2.69±0.06** |
|         | PO <sub>4</sub> <sup>3-</sup> -P | 0.97±0.09** | 1.31±0.16** | 1.43±0.20** | 1.44±0.28** | 1.39±0.15** | 1.26±0.14** | 1.07±0.09** | 1.18±0.07** | 1.10±0.06** | 1.28±0.20** | 1.45±0.09** |

**Note:** Data presented are the mean ± standard error (SE) of three independent experiments. Statistically significant differences in nutrient removal were observed between the phytohormone-treated groups and the control group at  $p < 0.05$  (\*) and  $p < 0.01$  (\*\*).

**Table S4** Effect of phytohormones on photosynthetic pigments and chlorophyll fluorescence parameters of *O. borgei*.

| Treatment                            |     | Control     | IAA          | GA3           | ZT           |
|--------------------------------------|-----|-------------|--------------|---------------|--------------|
| Total Chl (ng·cell <sup>-1</sup> )   | 2 d | 3.977±0.092 | 4.081±0.102  | 3.840±0.275   | 3.766±0.117  |
|                                      | 4 d | 4.087±0.077 | 5.393±0.014* | 5.021±0.175*  | 4.776±0.176* |
| Carotenoids (ng·cell <sup>-1</sup> ) | 2 d | 0.896±0.025 | 0.917±0.023  | 0.844±0.081   | 0.835±0.03   |
|                                      | 4 d | 1.033±0.02  | 1.348±0.002* | 1.25±0.049*   | 1.219±0.022* |
| Chla (ng·cell <sup>-1</sup> )        | 2 d | 3.544±0.095 | 3.648±0.098  | 3.408±0.272   | 3.339±0.117  |
|                                      | 4 d | 3.784±0.143 | 5.052±0.014* | 4.690±0.182*  | 4.452±0.179* |
| Chlb (ng·cell <sup>-1</sup> )        | 2 d | 1.752±0.025 | 1.783±0.038  | 1.709±0.087   | 1.680±0.035  |
|                                      | 4 d | 1.654±0.025 | 2.062±0.012* | 1.937±0.044*  | 1.899±0.021* |
| φPSII                                | 2 d | 0.804±0.013 | 0.896±0.017* | 0.850± 0.024* | 0.863±0.025* |
|                                      | 4 d | 0.848±0.018 | 0.905±0.006* | 0.904± 0.015* | 0.892±0.010* |
| Fv/Fm                                | 2 d | 0.783±0.027 | 0.908±0.013* | 0.862±0.011*  | 0.864±0.075* |
|                                      | 4 d | 0.809±0.002 | 0.905±0.009* | 0.905±0.012*  | 0.893±0.02*  |

**Note:** Data presented are the mean ± standard error (SE) of three independent experiments. Statistically significant differences were observed between the phytohormone-treated groups and the control group at *p* < 0.05 (\*).

**Table S5** Effect of phytohormones on activities of NR, GS, SOD and CAT in *O. borgei* after 4-day stimulation.

| Activity | NR (μmol·g <sup>-1</sup> FW·h <sup>-1</sup> ) | GS (μmol·g <sup>-1</sup> FW·h <sup>-1</sup> ) | SOD (U·g <sup>-1</sup> FW) | CAT (U·g <sup>-1</sup> FW) |
|----------|-----------------------------------------------|-----------------------------------------------|----------------------------|----------------------------|
| Control  | 0.056±0.039                                   | 0.021±0.005                                   | 80.196±28.735              | 1.898±0.543                |
| IAA      | 0.202±0.043*                                  | 0.082±0.007*                                  | 132.441±2.613*             | 29.471±5.257*              |
| GA3      | 0.209±0.024*                                  | 0.078±0.009*                                  | 149.856±13.405*            | 29.776±1.728*              |
| ZT       | 0.149±0.034*                                  | 0.077±0.005*                                  | 142.020±8.398*             | 29.614±0.321*              |

**Note:** Data presented are the mean ± standard error (SE) of three independent experiments. Statistically significant differences were observed between the phytohormone-treated groups and the control group at  $p < 0.05$  (\*).
